# Supplementary material for: Valection: design optimization for validation and verification studies
Source: BMC Bioinformatics. 2018 Sep 25;19:339. doi: 10.1186/s12859-018-2391-z (PMC6157051; doi:10.1186/s12859-018-2391-z)
Supplement: Supplementary file 11 — Table S10. A summary table of all submissions from the second ‘real’ dataset, the CLL tumour-normal sample, includes submission ID, the number of true positives, true negatives, false positives and false negatives, as well as the precision, recall and F1 scores. (CSV 1 kb) [file 12859_2018_2391_MOESM11_ESM.csv]

id	TP	TN	FP	FN	Precission	Recall	F1.score
CLL_A	929	5597	163	390	0.850732600732601	0.704321455648218	0.770634591455827
CLL_B	784	5719	41	535	0.95030303030303	0.594389689158453	0.73134328358209
CLL_C1	649	5559	201	670	0.763529411764706	0.492039423805914	0.598432457353619
CLL_C2	774	5490	270	545	0.741379310344828	0.586808188021228	0.655099449851883
CLL_D1	1180	5270	490	139	0.706586826347305	0.89461713419257	0.789561726329876
CLL_E	884	5691	69	435	0.927597061909759	0.670204700530705	0.778169014084507
CLL_G	834	5713	47	485	0.946651532349603	0.632297194844579	0.758181818181818
CLL_I	942	5696	64	377	0.936381709741551	0.714177407126611	0.810322580645161
CLL_K	811	3526	2234	508	0.266338259441708	0.614859742228961	0.371677360219982
CLL_O	1046	5538	222	273	0.824921135646688	0.793025018953753	0.808658678005412
CLL_P	1040	5567	193	279	0.843471208434712	0.788476118271418	0.815047021943574
CLL_R	774	5307	453	545	0.63080684596577	0.586808188021228	0.608012568735271
CLL_S	774	5452	308	545	0.715341959334566	0.586808188021228	0.644731361932528
CLL_T	446	5739	21	873	0.955032119914347	0.338134950720243	0.499440089585666
CLL_U	1210	3811	1949	109	0.383032605254827	0.917361637604246	0.540419830281376
